# Supplementary material for: DNA Methylation and Prospects for Predicting the Therapeutic Effect of Neoadjuvant Chemotherapy for Triple-Negative and Luminal B Breast Cancer
Source: MDPI journal article supplement (doi:10.3390/cancers15051630), 2023-03-06
Supplement: s1 [file s1]

## Supplementary material

### List of differentially methylated genes in TN breast cancer samples with different response to NACT

ABCA17P, ABCA3, ADAMTS2, ADAP1, AKT3, ALOXE3, ATP8B2, B4GALT7, BCL2L1, BEGAIN, BMP2, BMP3, BMPER, C1orf86, CAPN2, CCDC69, CD8BP, CDC34, CDO1, CELF2, CHRNA7, CLDND1, CLEC14A, CLIP3, CNTN4, COL4A1, COL4A2, CRIP1, CRT3, CSF3R, DCHS1, DLEU2, DMRT2, DMTN, DNAH10, DNAH3, DPYS, EBF4, EHMT1, ELAVL3, EPHA1, EPHA1-AS1, ESPN, EXOC6, FAM149A, FAM163A, FAM69C, FBN1, FBXW7, FMNL1, FOXR1, FYTDD1, GABRA5, GALR2, GAS6, GAS6-AS2, GATA6, GCOM1, GFRA1, GIPR, GLT1D1, GMDS, GNG10, GP5, GPC2, GPC4, GRIK1, GRIN1, HLA-AS1, HLX, HOXC13, HOXC13-AS, HPS1, HRAS, HUNK, IFNL3, INTS4L1, IRF4, KBTBD11, KCNIP2, KCNK12, KCNK17, KIAA0226, KIAA0930, KIAA1462, KLHL30, KRT8, LAMA3, LGALS1, LIMS2, LRCH2, LRRC27, LRRC56, LYPD6, MACROD1, MATK, MCOLN3, MFNG, MIR4453, MLC1, MPV17L, MRPL20, MT1G, MT1H, MYO15B, MYZAP, NANOS3, NEK4P2, NID2, NKX2-2, NKX2-2-AS1, NOTUM, NTN1, NTRK1, NUMBL, OR7E14P, OTUB1, PALM, PAX9, PDSS1, PHLDA2, PLEKHA7, PNCK, POLR2M, PPP4R1, PRR25, PTGER2, PTPRN, RAB34, RAB9A, RALA, RCE1, RFX1, RGS7, RN7SL657P, RNA5SP488, RNF128, RPH3AL, RPL23A, SCO2, SEMA3B, SEMA6D, SFMBT1, SFRP2, SHH, SMARCD3, SNORD42B, SOX21, SOX21-AS1, SPNS2, SRP68, SYNGR3, SYT12, TBCC, TCERG1, TERT, TLX3, TMEM200B, TNFRSF25, TNNT2, TOB1, TOB1-AS1, TRIP13, TUBB6, TWIST2, UBL4A, UBTF, UNCX, WDR13, ZNF385A, ZNF747, ACTL6B, ADAMTSL5, ADCY4, AGAP3, AJAP1, ALDH3B1, ALOX12, ANKRD23, ARHGAP8, ASPDH, B3GNTL1, BCAS2, BHLHA9, BMS1P18, BNC1, CACNA1H, CAPN15, CD46P1, CELF4, CHTF18, COL18A1-AS2, CPXM2, CPZ, CR1L, DBN1, DOCK1, EBF1, EDA, EFNB1, EMILIN1, EML2, ENTPD8, EPO, EVPL, FAM132B, FAM228A, FEV, FGF13, FGF13-AS1, FTH1P19, FZD10, FZD10-AS1, GBX1, GFM2, GPR143, H2BFM, HEYL, HMHA1, HMX2, HOXA9, HTATS1, IFI27, INTS1, IRF7, ISLR2, JOSD2, KCNA5, KCNQ1OT1, KLHL15, LHX3, LINC00354, LINC01006, LYSMD2, MAMDC2, MAPK8IP2, MEG3, MEGF8, MIR4478, MIR5587, MOSPD1, MTMR1, MXRA5, NARFL, NAT9, NSA2, NSUN5, NSUN5P1, OLFM2, PACSIN3, PARD3B, PARP10, PDE4A, PNPLA3, PPP1R14A, PRKCB, PSEN1, PTMA, RAB34, RBFADN, RN7SKP151, RN7SL554P, RN7SL734P, RPS6KA6, SH3GLB2, SH3KBP1, SLC35A2, SLC35F3, SLC7A2, SRD5A3-AS1, TAF4, TMEM104, TMEM132C, TMEM132D, TMEM165, TMOD2, TNNT3, TREX2, TRIM67, TTC34, TTC40, TTL12, USF2, VGLL4, WAS, WWTR1, WWTR1-AS1, XKR6, ZG16B, ZIK1.

### List of differentially methylated genes in luminal B breast cancer samples with different response to NACT

ANK1, ARHGAP9, ARMC4P1, C1QL3, CACNA1H, CEACAM22P, CNPY1, COL18A1, COL9A1, DMRT3, EBF1, FAM83H-AS1, FBXO17, FLT4, GATA2, GNAS, HEYL, IFI27, INTS1, ISLR2, KLHL15, KRTCAP3, LAD1, LINC00354, LINC00629, LRRC37A6P, LTBR, MARS, MIR4489, NMRK2, PGR, PLXNB2, PNPLA7, RBOX1, RFPL3, RPH3AL, RUNX3, SDK1, SIPA1, SIX1, SLC13A3, SLC16A12, SNORD111, SNTG1, TSPAN11, XKR6, ZNF578, ABCA17P, ABCA3, ABHD12B, ACADS, ADAMTS7P3, ADCY9, ADRA2A, AJAP1, ANKRD36BP2, ARID3A, ATP1A3, BARX1, BMS1P17, BNC1, BNIP3, C17orf64, CAPN15, CCDC137, CD248, CD8A, CDX1, CELF4, CKB, CLEC14A, CLEC4G, COL9A2, CRMP1, CTSA, CYBA, DKK1, DLG4, DMRTC1, DOK1, DPP6, DPYS, DPYSL3, DUSP9, EFNA2, EGFL7, EPS8L1, ERICH1, ERICH1-AS1, FAM155B, FAM228A, FAM83H-AS1, FBXL16, FOXE3, FOXH1, FOXI2, FSTL1, GALR2, GAS6, GBGT1, GLP1R, GNAT1, GPR25, GSC2, GUSBP1, HAND2, HAND2-AS1, HHAT, HMGB3, HOXD12, IBA57-AS1, IRF4, ITGB4, KLHL34, KRMEN1, L1TD1, LINC00092, LINC00159, LINC00273, LINC01044, LOXL3, LRRC38, LTBP3, MAPK12, MAPK8IP2, MIR503, MIR503HG, MIR5587, MUM1, MYO15B, NEURL2, NKX2-2, NODAL, NOTUM, NPR2, NRN1, OLIG3, OXT, PALM, PHKA2, PLCD1, PNCK, PPP1R14BP2, PPP1R16A, PPP1R16B, PRKAR1B, PRKCB, PRKG1-AS1, PROX1-AS1, PRR5, PRSS44, PRSS45, PRSS50, PSKH2, PTGIS, QRFPR, RABL6, RALGDS, RAP1GAP2, RBPJ, RHOQP2, RHOQP3, RN7SL121P, RNA5SP175, RNU6-664P, RPL10, SALL1, SEMA5B, SEPT9, SFRP2, SLC25A43, SLC30A2, SLC6A3, SLC6A8, SNAP25, SNAP25-AS1, SOX1, SOX21, SRP68, TCEA2, TERT, THNSL2, TMEM132C, TMEM132D, TMEM164, TMEM235, TMEM92, TRABD, TTC22, TTC34, USP32, VGLL4, VSX1, VWC2, WAS, WBSR17, YBX1P1, YBX1P10, YBX1P6, ZAR1, ZIC1, ZNF630.

**Table S1.** Sequences and specific modifications of the sequencing adapters used in the XmaI-RRBS protocol. (M, Methylated cytosine). Unique 5 bp barcodes are highlighted in gray.

| Adapter          | Sequence (5'-3')                              |
|------------------|-----------------------------------------------|
| RRBS-ADP-Ac-1    | GGTTGTTCTGAGTCGGAGACACGCAGGGATGAGATGGTT       |
| RRBS-ADP-A-me-1  | MMATMTMATMMMTG MGTGTM TMMGAMTMAGAAMAA         |
| RRBS-ADP-Ac-2    | GGCGATTCTGAGTCGGAGACACGCAGGGATGAGATGGTT       |
| RRBS-ADP-A-me-2  | MMATMTMATMMMTG MGTGTM TMMGAMTMAGAATMG         |
| RRBS-ADP-Ac-3    | GGCTTA ACTGAGTCGGAGACACGCAGGGATGAGATGGTT      |
| RRBS-ADP-A-me-3  | MMATMTMATMMMTG MGTGTM TMMGAMTMAGTTAAG         |
| RRBS-ADP-Ac-4    | GGCACCTCTGAGTCGGAGACACGCAGGGATGAGATGGTT       |
| RRBS-ADP-A-me-4  | MMATMTMATMMMTG MGTGTM TMMGAMTMAGAGGTG         |
| RRBS-ADP-Ac-5    | GGCAGTGCTGAGTCGGAGACACGCAGGGATGAGATGGTT       |
| RRBS-ADP-A-me-5  | MMATMTMATMMMTG MGTGTM TMMGAMTMAGMAMTG         |
| RRBS-ADP-Ac-6    | GGCGCGGCTGAGTCGGAGACACGCAGGGATGAGATGGTT       |
| RRBS-ADP-A-me-6  | MMATMTMATMMMTG MGTGTM TMMGAMTMAGMMGMG         |
| RRBS-ADP-Ac-7    | GGTTAGGCTGAGTCGGAGACACGCAGGGATGAGATGGTT       |
| RRBS-ADP-A-me-7  | MMATMTMATMMMTG MGTGTM TMMGAMTMAGMMTAA         |
| RRBS-ADP-Ac-8    | GGCCTCGCTGAGTCGGAGACACGCAGGGATGAGATGGTT       |
| RRBS-ADP-A-me-8  | MMATMTMATMMMTG MGTGTM TMMGAMTMAGMGAGG         |
| RRBS-ADP-Ac-9    | GGTCGAGCTGAGTCGGAGACACGCAGGGATGAGATGGTT       |
| RRBS-ADP-A-me-9  | MMATMTMATMMMTG MGTGTM TMMGAMTMAGMTMGA         |
| RRBS-ADP-Ac-10   | GGTATGACTGAGTCGGAGACACGCAGGGATGAGATGGTT       |
| RRBS-ADP-A-me-10 | MMATMTMATMMMTG MGTGTM TMMGAMTMAGTMATA         |
| RRBS-ADP-Ac-11   | GGTCCTACTGAGTCGGAGACACGCAGGGATGAGATGGTT       |
| RRBS-ADP-A-me-11 | MMATMTMATMMMTG MGTGTM TMMGAMTMAGTAGGA         |
| RRBS-ADP-Ac-12   | GGCCAGACTGAGTCGGAGACACGCAGGGATGAGATGGTT       |
| RRBS-ADP-A-me-12 | MMATMTMATMMMTG MGTGTM TMMGAMTMAGTMTGG         |
| RRBS-ADP-Ac-13   | GGTGACACTGATCGGAGACACGCAGGGATGAGATGGTT        |
| RRBS-ADP-A-me-13 | MMATMTMATMMMTG MGTGTM TMMGAMTMAGTGTMA         |
| RRBS-ADP-P1      | GGATCACCGACTGCCCATAGAGAGGAAAGCGGAGGCGTAGTGGTT |
| RRBS-ADP-P1-me   | MMAMTAMGMMTMMGMTTTMMTMTMTATGGGMAGTMGGTGAT     |

**Table S2.** Genome regions selected for MSRE-qPCR Positive internal Controls (PCs) and a Digestion efficacy Controls (DCs)

| Target chromosome | Target start | Target end | ID            |
|-------------------|--------------|------------|---------------|
| chr3              | 98241588     | 98241591   | PC1_CLDND1    |
| chr19             | 1154197      | 1154248    | PC2_SBNO2     |
| chr20             | 18548097     | 18548098   | PC3_LINC00493 |
| chr18             | 61670062     | 61670111   | PC4           |
| chr3              | 43663510     | 43663525   | DC1_ANO10     |
| chr3              | 43732464     | 43732475   | DC2_ABHD5     |
| chr3              | 43732768     | 43732797   | DC3_ABHD5     |
| chr3              | 45267187     | 45267202   | DC4_TMEM158   |
| chr3              | 45267747     | 45267774   | DC5_TMEM158   |

**Table S3.** Primers and TaqMan-probes of 11 pools comprising candidate DNA methylation markers of BC NACT effectiveness. The G (general) pools include markers that discriminate both TN and luminal B tumors in terms of response to NACT; the TN (triple-negative) pools include markers exclusive for TNBC; and LB (luminal B), for luminal B subtype.

| Pool_Locus             | Primers sequence (5'-3')                                    | Length, bp | TaqMan probe sequence (5'-3')            | T, °C | BstHII sites |
|------------------------|-------------------------------------------------------------|------------|------------------------------------------|-------|--------------|
| <i>G1_PC_SBNO2</i>     | F: CGTCCACTGGGGCAGCATTC<br>R: CGGAGCGAGAAGCCCAGATAGA        | 293        | FAM-CGGGTA+AT+CC+CTGT+C+CA+TG-BHQ1       |       | 0            |
| <i>G1_DC_TMEM158</i>   | F: CTCCAGACCCGGTTGCGTTT<br>R: GGGAATCCTGCTCTGGGATAGCA       | 106        | HEX-CTGCCG+CGCT+GCT+CTG-BHQ2             |       | 2            |
| <i>G1_TERT</i>         | F: AGAAAGGAAGGGGAGGGGCTG<br>R: CGCTGGCGTCCCTGCA             | 303        | ROX-AGC+TG+GAA+GG+T+G+AAG-BHQ2           | 66    | 7            |
| <i>G1_TTC34_1</i>      | F: TCAGTGTGGCCTCTTCTGCCA<br>R: GGGAGTCTGGGGTCGGATTGA        | 293        | CY5-TGG+T+AG+TGAAG+C+C+TC-BHQ2           |       | 3            |
| <i>G1_TMEM132D_3</i>   | F: GTGGCCGGGCTCGCTG<br>R: GCCGCACCCGCCAAACT                 | 122        | CY5.5-CCCCA+TCCCAGGCC+GG-BHQ2            |       | 6            |
| <i>G2_PC_LINC00493</i> | F: CACAGTTCTACACCCGAAAGTCC<br>R: GTGAATCATTTCGATACATGGGTACG | 224        | FAM-TCCTTAA+T+GGTTCC+GGCG-BHQ1           |       | 0            |
| <i>G2_DC_ANO10</i>     | F: CGGGCGAAAGAGTGCTCG<br>R: CCTGCGTGTGACCGCATC              | 108        | HEX-AGCGCTGGGCGTGGCGGA-BHQ2              |       | 4            |
| <i>G2_TMEM132D_2</i>   | F: CCCTGCGAGCGCGGA<br>R: GCCCTTCTCCAGCCATCCTT               | 209        | ROX-CG+T+CA+T+CAAAA+C+C+TCAG-BHQ2        | 64    | 4            |
| <i>G2_VGLL4_2</i>      | F: CTGTTCTTGGTCAGTGCGAGG<br>R: TAAATAAGCAACACGGAGTGCCTG     | 252        | CY5-CGTTTTCT+CAAA+GG+CAAA+GGG-BHQ2       |       | 3            |
| <i>G3_PC3</i>          | F: CGCCCTCGGTGCCGAC<br>R: GAATGCGAGGAGAGGAGATGGAAATG        | 245        | CY5.5-CC+GGGAT-BHQ2-AATAA+GGTCTGT+G+GGTG |       | 0            |
| <i>G3_DC_ANO10</i>     | F: GGGCGAAAGAGTGCTCGGTG<br>R: CTGCGTGTGACCGCATCTAGG         | 106        | CY5-CGGGCCAGGCCAGT-BHQ2-GGGGCGG          |       | 4            |
| <i>G3_ABCA3_1</i>      | F: GACTCCCGGGCTCCAGCA<br>R: GGCGTTGCATTAGGTCGGGG            | 250        | FAM-ACC+ACAGT-BHQ1-GA+GGTGC+GTCCGTGGT    | 64    | 5            |
| <i>G3_DPYS_1</i>       | F: ACCCGCAGCCCCGCA<br>R: TGCAGGAGGGCACCCCAAG                | 241        | HEX-A+GAAG+TCAT-BHQ2-CGTT+GA+CCACGC+GAC  |       | 6            |

| Pool_Locus             | Primers sequence (5'-3')                               | Length,<br>bp | TaqMan probe sequence (5'-3')        | T, °C | BstHII<br>sites |
|------------------------|--------------------------------------------------------|---------------|--------------------------------------|-------|-----------------|
| <i>G3_IRF4</i>         | F: GGCAGCTCTTCTCCCCGCA<br>R: GCTCTTCTCCTCGTTCTCCACA    | 219           | ROX-C+CAG+T+GGCT-BHQ2+GATCGACCAGATCG | 62    | 3               |
| <i>G4_PC2_CLDND1</i>   | F: GAACGGCGGTTTCGTCCAAG<br>R: CATGTTCCCGGCGGTTTGAAG    | 238           | Cy5-CC+CCGGT-BHQ2-ACCC+GACCAGG       |       | 0               |
| <i>G4_DC6_ABHD5</i>    | F: GGCTCCCCTCAGCGTCG<br>R: GCTTATACAACAACGGGGCGG       | 105           | FAM-CCGG+GAGGCC+GCCT-BHQ1-TGAC       |       | 4               |
| <i>G4_TM132C_1</i>     | F: GAGTGGCCCCGGGCAT<br>R: CGGAACCGGGAAGTTCGCA          | 232           | HEX-AGCGGC+CGGGACGCAGG-BHQ1          |       | 9               |
| <i>G4_SFRP2_1</i>      | F: CAGTGCAGGCGAGGAAGA<br>R: CAGCAACGGCTCATTCTGCT       | 294           | ROX-CAGAG+GGAGCGGAGCCGGG-BHQ2        |       | 7               |
| <i>G5_PC3</i>          | F: CCCAGCCTCTCCAGGAGGTA<br>R: TGCAGAGAGAGGAGATGGAAATGC | 286           | Cy5-CC+G+GGATAATAA+GGTCTG+TGG-BHQ3   | 65    | 0               |
| <i>G5_DC_ANO10</i>     | F: GGCGAAAGAGTGCTCGGTGC<br>R: CCCTGCGTGTGACCGCATC      | 107           | FAM-CGGGCCAGGCCAGTGGGGC-BHQ1         |       | 4               |
| <i>G5_SOX21</i>        | F: CCCGGCCTGTGATCGCTTTC<br>R: TGCCACAGAGCTGGGCCT       | 150           | Cy5.5-CGAGCTCCCGGGCCGGCG-BHQ3        |       | 4               |
| <i>G5_MYO15B</i>       | F: CCGGGGAGGGGAAAGGACC<br>R: CCCTGAGGCCGGCCTCC         | 117           | HEX-CTC+CTTTGG+GCCAGCCA+TGGG-BHQ1    |       | 3               |
| <i>G5_TM132D_3</i>     | F: GGTGGCCGGGCTCGCT<br>R: CAGCCGCACCCGCCAAAC           | 125           | ROX-CGGCCCCGGGCTCCCTGG-BHQ2          |       | 6               |
| <i>TN1_PC5_ALDH4A1</i> | F: CCACTTTGATCCGACTGTG<br>R: GGAAAGAACTTCCAATTCTGT     | 184           | Cy5-TGG+CCACCGT-BHQ2-AC+TCGAAG       | 58    | 0               |
| <i>TN1_ABCA3_1</i>     | F: AGGGAGAGGTGGAGTGA<br>R: TCCAGAACATCATCAGAGTGA       | 384           | HEX-CCAA+GAGT-BHQ2+CCTGA+TGGAGTAG    |       | 5               |
| <i>TN1_CDO1_1</i>      | F: GATCTGTGGGTTTCATCCT<br>R: AGACAACGGGGCTCTTG         | 197           | ROX-TTA+AG+CG+CT-BHQ2-T+GGAGTC       |       | 3               |
| <i>TN1_CLEC14A_1</i>   | F: CAGGGACACAACACATCG<br>R: CCGCCTCTAACTTGAGCTA        | 181           | Cy-5.5-AGTTTGT-BHQ3-CCAGC+GAGCG      |       | 4               |
| <i>TN2_PC8</i>         | F: TCCGGAAGAACCGAAAA<br>R: CTTAAGCCACTCCCAAGC          | 283           | Cy5.5-A+CCTC+GCT-BHQ2-CAGACTCGTG     |       | 0               |
| <i>TN2_DC8_TCAIM</i>   | F: GACGTCAGCTAGAGGCA<br>R: GGTGACGCCCTGGTT             | 108           | FAM-A+CCG+CGGAAGGT-BHQ1TGAATC        | 58    | 3               |
| <i>TN2_DLEU2_1</i>     | F: GAGCGAAAGCAAAACGAAA<br>R: CTTTTCGAAGGGGGTTGAG       | 198           | HEX-CCAAG+AT-BHQ2-CTG+A+GGT+CG       |       | 4               |

| Pool_Locus               | Primers sequence (5'-3')                            | Length,<br>bp | TaqMan probe sequence (5'-3')     | T, °C | BstHII<br>sites |
|--------------------------|-----------------------------------------------------|---------------|-----------------------------------|-------|-----------------|
| <i>TN3_PC7_LINC00493</i> | F: GACACCTGAGCGACTTTC<br>R: GTGAACTCATTTTCGATACATGG | 200           | Cy5.5-AAGC+GGACGC+TGAAAACT-BHQ3   | 58    | 0               |
| <i>TN3_DC4_ANO10</i>     | F: CGAAAGAGTGCTCGGTG<br>R: GGAGCTACCGCCCAG          | 153           | FAM-CCTA+GAT-BHQ1-GCGGTCA+CACG    |       | 7               |
| <i>TN3_BNC1_1</i>        | F: CGGATAACGCCCTAAATCAG<br>R: GAGGCCGAATCATCTCCT    | 215           | HEX-CACAGA+CGT-BHQ2-GT+CGGTGTT    |       | 3               |
| <i>TN3_SFRP2_1</i>       | F: AGTTCGAGCTTGTCCCG<br>R: CACCCTCCAGATTGCATAA      | 232           | ROX-AGA+AT+G+AGC+CGTT-BHQ2-GCT    |       | 4               |
| <i>TN3_TTC34_1</i>       | F: ATTGTTGGACCTGGGGT<br>R: CTTGATCTCCCCTCTTGGT      | 230           | Cy-5-CGCCAT-BHQ2-GAGC+TC+TG+AGTC  |       | 3               |
| <i>TN4_PC6</i>           | F: TAGAGGAAGTCGTAGAGGTGT<br>R: TCATTGTGTCTTGACAACCG | 244           | Cy5.5-CGG+CACT-BHQ2-AG+CAGAGACCA  | 58    | 0               |
| <i>TN4_DC10_TMEM158</i>  | F: CCCCAGGTGCTCGATG<br>R: CGACCTACTGCTCTTCTCC       | 97            | FAM-CGAAGA+AAGCGCGGCCGt-BHQ1      |       | 2               |
| <i>TN4_PRKCB_2</i>       | F: TCAAGAACCACAAATTCACCG<br>R: ACTGTCCATCCGGGAGT    | 240           | HEX-CTT+CA+TCT-BHQ2+GGT+GAGCG     |       | 6               |
| <i>TN4_GMDS_1</i>        | F: CAGCTCCCCTCACTTCTC<br>R: TCGCTTTCGATGTGAGTATCT   | 148           | Cy5-CCCG+ACCC+TGAG+AGC-BHQ3       |       | 3               |
| <i>TN6_PC10_FAM83A</i>   | F: CACCTCTACGCCTCCTCCAA<br>R: TGAAGACGCGGACACACTTC  | 198           | Cy5.5-AAT+GGCC+GCCT-BHQ2-TA+GCAGC |       | 0               |
| <i>TN6_DC10_TMEM158</i>  | F: GGTGCTCGATGAGCAGCG<br>R: CTTCCAGTGCGACCTACTGC    | 101           | FAM-CGAA+GAAAGCGCG+GCCGT-BHQ1     | 62    | 2               |
| <i>TN6_MYO15B_1</i>      | F: TGCACTGCACAGAAGGTCAC<br>R: CGACTCCTGCTCCCCTGA    | 166           | ROX-CGG+GA+G+G+CCAA+ATCC-BHQ2     |       | 3               |
| <i>TN6_TMEM132D_1</i>    | F: AAAAGCCCCACCCTTTCGG<br>R: CTCAGTGTGGCGTGTCAAG    | 373           | Cy5-CAC+CGGCCT+CT-BHQ2-CGTC+GTC   |       | 3               |
| <i>LB1_PC3</i>           | F: TCTCCCAGGAGGTAGGGAC<br>R: CACAGACCTTATTATCCCGGC  | 174           | Cy5.5-AAGGCAGAA+GGCCCCCAA-BHQ3    |       | 0               |
| <i>LB1_DC12_TMEM158</i>  | F: GACCCGGTTGCGTTTGG<br>R: GGGAATCCTGCTCTGGGATA     | 101           | FAM-CTGC+CGCGCT-BHQ1-GCTCTG       |       | 3               |
| <i>LB1_LTBR</i>          | F: GAAAACTCCCACAGTAGGGC<br>R: GAGCAGAGGGAGTTCCAGAG  | 198           | ROX-TTCTGC+GGCC+TT-BHQ2-GCAGTC    | 62    | 3               |
| <i>LB1_NRN1</i>          | F: GCTGTGGCCATCTCTTCC<br>R: CGGGACACATTACACACAA     | 230           | Cy-5-CT+GGAAGC+TG+AGTGCC-BHQ3     |       | 5               |

**Table S4.** Predictive value of individual epigenetic markers for predicting sensitivity to NACT for triple-negative breast tumors, measured by MSRE-qPCR,  $n=48$

| Target locus  | Sensitive tumors group<br>b-value | Resistant tumors group<br>b-value | Sensitiv-<br>ity | Specific-<br>ity | Accu-<br>racy | cvAUC | 95% CI    | p-value |
|---------------|-----------------------------------|-----------------------------------|------------------|------------------|---------------|-------|-----------|---------|
| G2_TM132D_2   | 59.46                             | 79                                | 0.64             | 0.72             | 0.66          | 0.72  | 0.71-0.74 | 0.01    |
| G3_ABCA3_1    | 36.01                             | 49.09                             | 0.8              | 0.6              | 0.74          | 0.69  | 0.67-0.70 | 0.02    |
| G3_DPYS_1     | 33.72                             | 57.27                             | 0.64             | 0.66             | 0.64          | 0.67  | 0.65-0.69 | 0.01    |
| G5_MYO15B     | 43.35                             | 58.28                             | 0.58             | 0.66             | 0.60          | 0.65  | 0.64-0.67 | 0.03    |
| TN4_GMDS_1    | 60.93                             | 73.16                             | 0.73             | 0.71             | 0.72          | 0.64  | 0.63-0.66 | 0.06    |
| TN1_CDO1_1    | 38.46                             | 53.94                             | 0.77             | 0.58             | 0.71          | 0.64  | 0.62-0.66 | 0.06    |
| TN3_SFRP2_1   | 23.8                              | 37.63                             | 0.58             | 0.64             | 0.60          | 0.63  | 0.62-0.65 | 0.03    |
| TN2_DLEU2_1   | 50.82                             | 67.88                             | 0.78             | 0.53             | 0.70          | 0.63  | 0.61-0.64 | 0.07    |
| G4_SFRP2_1    | 16.36                             | 28.05                             | 0.72             | 0.58             | 0.67          | 0.62  | 0.60-0.64 | 0.10    |
| G3_IRF4       | 26.01                             | 36.4                              | 0.65             | 0.57             | 0.63          | 0.6   | 0.58-0.62 | 0.12    |
| G4_TM132C_1   | 12.06                             | 29.58                             | 0.72             | 0.54             | 0.67          | 0.6   | 0.58-0.62 | 0.11    |
| G2_VGLL4_2    | 97.16                             | 98.7                              | 0.49             | 0.73             | 0.57          | 0.59  | 0.57-0.61 | 0.22    |
| G1_TERT       | 37.95                             | 51.83                             | 0.65             | 0.63             | 0.64          | 0.58  | 0.56-0.59 | 0.19    |
| G5_TM132D_3   | 40.52                             | 49.48                             | 0.43             | 0.74             | 0.53          | 0.57  | 0.56-0.59 | 0.16    |
| G5_SOX21      | 43.47                             | 53.85                             | 0.69             | 0.48             | 0.63          | 0.57  | 0.55-0.59 | 0.16    |
| TN1_CLEC14A_1 | 78.42                             | 83.8                              | 0.46             | 0.7              | 0.53          | 0.51  | 0.49-0.52 | 0.50    |
| G1_TM132D_3   | 36.09                             | 42.97                             | 0.6              | 0.48             | 0.57          | 0.5   | 0.48-0.52 | 0.63    |
| TN4_PRKCB_2   | 22.71                             | 29.63                             | 0.78             | 0.25             | 0.61          | 0.49  | 0.47-0.51 | 0.24    |
| LB1_LTBR      | 55.27                             | 61.38                             | 0.75             | 0.25             | 0.59          | 0.46  | 0.44-0.48 | 0.69    |
| G1_TTC34_1    | 29.82                             | 30.78                             | 0.02             | 0.98             | 0.32          | 0.43  | 0.41-0.44 | 0.47    |
| TN1_ABCA3_1   | 38.33                             | 39.75                             | 0                | 1                | 0.31          | 0.38  | 0.36-0.40 | 0.83    |
| TN3_TTC34_1   | 47.63                             | 48.49                             | 0                | 1                | 0.31          | 0.36  | 0.35-0.38 | 0.90    |
| TN3_BNC1_1    | 58.72                             | 60.51                             | 0                | 1                | 0.31          | 0.36  | 0.35-0.38 | 0.85    |
| LB1_NRN1      | 17.98                             | 18.46                             | 0                | 1                | 0.31          | 0.35  | 0.33-0.37 | 0.88    |

**Table S5.** Predictive value of individual epigenetic markers for predicting sensitivity to NACT for luminal B breast tumors, measured by MSRE-qPCR, *n*=35

| Target locus  | Sensitive tumors<br>group b-value | Resistant tumors<br>group b-value | Sensitivity | Specificity | Accuracy | cvAUC | 95% CI    | p-value |
|---------------|-----------------------------------|-----------------------------------|-------------|-------------|----------|-------|-----------|---------|
| LB1_LTBR      | 51.24                             | 58.76                             | 0.66        | 0.75        | 0.70     | 0.69  | 0.67-0.71 | 0.02    |
| G2_VGLL4_2    | 90.89                             | 94.83                             | 0.78        | 0.58        | 0.69     | 0.63  | 0.62-0.65 | 0.07    |
| G3_DPYS_1     | 42.8                              | 29.21                             | 0.61        | 0.52        | 0.57     | 0.6   | 0.58-0.62 | 0.15    |
| TN1_CLEC14A_1 | 84.38                             | 93.17                             | 0.34        | 0.9         | 0.59     | 0.57  | 0.55-0.59 | 0.19    |
| G1_TTC34_1    | 23.72                             | 28.36                             | 0.47        | 0.67        | 0.57     | 0.56  | 0.54-0.58 | 0.23    |
| TN3_BNC1_1    | 63.98                             | 72.78                             | 0.76        | 0.39        | 0.59     | 0.54  | 0.52-0.56 | 0.35    |
| TN4_SMD5_1    | 81.16                             | 79.03                             | 0.63        | 0.43        | 0.54     | 0.5   | 0.48-0.52 | 0.32    |
| TN1_ABCA3_1   | 47.94                             | 42.08                             | 0.42        | 0.68        | 0.54     | 0.5   | 0.48-0.52 | 0.42    |
| TN3_TTC34_1   | 57.41                             | 52.17                             | 0.39        | 0.7         | 0.53     | 0.49  | 0.48-0.51 | 0.64    |
| TN3_SFRP2_1   | 53.6                              | 60.79                             | 0.29        | 0.82        | 0.53     | 0.47  | 0.45-0.49 | 0.84    |
| G3_IRF4       | 48.47                             | 44.06                             | 0.3         | 0.73        | 0.50     | 0.44  | 0.43-0.46 | 0.57    |
| G3_ABCA3_1    | 41.53                             | 38.04                             | 0           | 1           | 0.46     | 0.43  | 0.41-0.45 | 0.64    |
| G4_TMEM132C_1 | 25.94                             | 20.03                             | 0.21        | 0.81        | 0.49     | 0.43  | 0.41-0.45 | 0.99    |
| LB1_NRN1      | 38.34                             | 33.5                              | 0.16        | 0.88        | 0.49     | 0.42  | 0.40-0.43 | 0.73    |
| G1_TMEM132D_3 | 39.91                             | 42.23                             | 0           | 1           | 0.46     | 0.4   | 0.38-0.41 | 0.78    |
| G4_SFRP2_1    | 29.36                             | 32.01                             | 0           | 1           | 0.46     | 0.37  | 0.35-0.39 | 0.72    |
| TN1_CDO1_1    | 65.4                              | 63.22                             | 0           | 1           | 0.46     | 0.36  | 0.35-0.38 | 0.48    |
| G5_TMEM132D_3 | 36.41                             | 38.84                             | 0           | 1           | 0.46     | 0.36  | 0.34-0.38 | 0.79    |
| G5_MYO15B     | 66.43                             | 65.25                             | 0           | 1           | 0.46     | 0.35  | 0.33-0.37 | 0.73    |
| G5_SOX21      | 60.51                             | 59.56                             | 0           | 1           | 0.46     | 0.34  | 0.33-0.36 | 0.59    |
| G2_TMEM132D_2 | 54.13                             | 53.15                             | 0           | 1           | 0.46     | 0.33  | 0.32-0.35 | 0.99    |
| G1_TERT       | 31.54                             | 30.32                             | 0           | 1           | 0.46     | 0.32  | 0.30-0.34 | 0.93    |
| TN2_DLEU2_1   | 64.51                             | 64.05                             | 0           | 1           | 0.46     | 0.32  | 0.30-0.34 | 0.87    |
| TN4_PRKCB_2   | 43.46                             | 42.71                             | 0           | 1           | 0.46     | 0.32  | 0.30-0.33 | 0.83    |

**Table S6.** Predictive value of top 10 panels of epigenetic markers for predicting sensitivity to NACT of triple-negative breast tumors, measured by MSRE-qPCR.

| Target locus                                    | Sensitivity | Specificity | Accuracy | cvAUC | 95% CI    |
|-------------------------------------------------|-------------|-------------|----------|-------|-----------|
| G2_TM132D_2, G5_MY15B                           | 0.76        | 0.76        | 0.76     | 0.83  | 0.81-0.83 |
| G2_TM132D_2, G4_TM132C_1, G5_MY15B              | 0.76        | 0.76        | 0.76     | 0.83  | 0.81-0.83 |
| G2_TM132D_2, G5_MY15B, TN2_DLEU2_1              | 0.66        | 0.88        | 0.73     | 0.82  | 0.81-0.83 |
| G2_TM132D_2, G5_MY15B, TN3_SFRP2_1              | 0.72        | 0.77        | 0.74     | 0.82  | 0.81-0.83 |
| G2_TM132D_2, G2_VG14_2, G4_TM132C_1, G5_MY15B   | 0.63        | 0.85        | 0.70     | 0.82  | 0.80-0.82 |
| G2_TM132D_2, G5_MY15B, TN3_SFRP2_1, TN4_G14S_1  | 0.52        | 0.94        | 0.65     | 0.82  | 0.80-0.82 |
| G2_TM132D_2, G3_IRF4, G5_MY15B                  | 0.75        | 0.75        | 0.75     | 0.82  | 0.80-0.82 |
| G2_TM132D_2, G3_AB143_1, G5_MY15B, TN3_SFRP2_1  | 0.71        | 0.76        | 0.73     | 0.81  | 0.80-0.82 |
| G2_TM132D_2, G3_AB143_1, G5_MY15B               | 0.78        | 0.70        | 0.75     | 0.81  | 0.80-0.82 |
| G2_TM132D_2, G4_TM132C_1, G5_MY15B, TN2_DLEU2_1 | 0.58        | 0.89        | 0.68     | 0.81  | 0.80-0.82 |

**Table S7.** Predictive value of top 10 panels of epigenetic markers for predicting sensitivity to NACT of luminal B breast tumors, measured by MSRE-qPCR.

| Target locus                                              | Sensitivity | Specificity | Accuracy | cvAUC | 95% CI    |
|-----------------------------------------------------------|-------------|-------------|----------|-------|-----------|
| G1_TTC34_1, LB1_LTBR, TN1_C1EC14A_1                       | 0.70        | 0.79        | 0.74     | 0.76  | 0.74-0.77 |
| LB1_LTBR, TN1_C1EC14A_1                                   | 0.83        | 0.69        | 0.77     | 0.75  | 0.73-0.76 |
| G1_TTC34_1, G3_DPYS_1, LB1_LTBR, TN1_C1EC14A_1            | 0.64        | 0.78        | 0.71     | 0.74  | 0.72-0.75 |
| G3_DPYS_1, LB1_LTBR, TN1_C1EC14A_1                        | 0.83        | 0.63        | 0.74     | 0.74  | 0.72-0.75 |
| G1_TTC34_1, G2_VG14_2, LB1_LTBR, TN1_C1EC14A_1            | 0.69        | 0.77        | 0.73     | 0.72  | 0.70-0.74 |
| G2_VG14_2, LB1_LTBR, TN1_C1EC14A_1                        | 0.81        | 0.67        | 0.74     | 0.72  | 0.70-0.73 |
| G2_VG14_2_Cy5, G3_DPYS_1, LB1_LTBR, TN1_C1EC14A_1         | 0.70        | 0.73        | 0.71     | 0.71  | 0.69-0.73 |
| G2_VG14_2, G3_DPYS_1, TN1_C1EC14A_1                       | 0.72        | 0.70        | 0.71     | 0.71  | 0.68-0.72 |
| G1_TTC34_1, G2_VG14_2, G3_DPYS_1, LB1_LTBR, TN1_C1EC14A_1 | 0.62        | 0.77        | 0.69     | 0.71  | 0.68-0.71 |
| G1_TTC34_1, G3_DPYS_1, TN1_C1EC14A_1                      | 0.75        | 0.66        | 0.71     | 0.70  | 0.68-0.69 |



**Table S8.** Predictive value of top 10 combined panels of epigenetic and clinical/morphological markers for predicting NACT sensitivity of triple-negative breast tumors.

| Target locus                                            | Sensitivity | Specificity | Accuracy | cvAUC | 95% CI    |
|---------------------------------------------------------|-------------|-------------|----------|-------|-----------|
| G2_TMEM132D_2, G4_TMEM132C_1, G5_MYO15B, S              | 0.76        | 0.80        | 0.79     | 0.87  | 0.85-0.88 |
| G2_TMEM132D_2, G5_MYO15B, DLEU2, S                      | 0.80        | 0.80        | 0.82     | 0.86  | 0.85-0.87 |
| G2_TMEM132D_2, G2_VGLL4_2, G4_TMEM132C_1, G5_MYO15B, S  | 0.81        | 0.77        | 0.80     | 0.86  | 0.84-0.87 |
| G2_TMEM132D_2, G5_MYO15B, S                             | 0.84        | 0.71        | 0.79     | 0.86  | 0.84-0.87 |
| G2_TMEM132D_2, TN3_SFRP2_1, G5_MYO15B, S                | 0.85        | 0.76        | 0.83     | 0.86  | 0.84-0.87 |
| G2_TMEM132D_2, G5_MYO15B, SFRP2, S                      | 0.79        | 0.79        | 0.81     | 0.86  | 0.84-0.86 |
| G2_TMEM132D_2, TN3_SFRP2_1, G5_MYO15B, S                | 0.89        | 0.68        | 0.81     | 0.86  | 0.84-0.86 |
| TERT, G2_TMEM132D_2, G4_TMEM132C_1, TN3_SFRP2_1, S      | 0.76        | 0.85        | 0.83     | 0.85  | 0.84-0.86 |
| G2_TMEM132D_2, G3_DPYS_1, G5_MYO15B, TN2_DLEU2_1, S     | 0.80        | 0.80        | 0.84     | 0.85  | 0.84-0.86 |
| G2_TMEM132D_2, G4_TMEM132C_1, G5_MYO15B, TN3_SFRP2_1, S | 0.82        | 0.78        | 0.80     | 0.85  | 0.84-0.86 |

**Table S9.** Predictive value of top 10 combined panels of epigenetic and clinical/morphological markers for predicting NACT sensitivity of luminal B breast tumors.

| Target locus                            | Sensitivity | Specificity | Accuracy | cvAUC | 95% CI    |
|-----------------------------------------|-------------|-------------|----------|-------|-----------|
| LB1_LTBR, TN1_CLEC14A_1, N              | 0.89        | 0.71        | 0.81     | 0.83  | 0.82-0.85 |
| G3_DPYS_1, N                            | 0.67        | 0.91        | 0.78     | 0.83  | 0.81-0.84 |
| G3_DPYS_1, TN1_CLEC14A_1, N             | 0.86        | 0.74        | 0.80     | 0.82  | 0.81-0.84 |
| G2_VGLL4_2, G3_DPYS_1, TN1_CLEC14A_1    | 0.79        | 0.79        | 0.79     | 0.82  | 0.80-0.83 |
| G2_VGLL4_2, G3_DPYS_1, N                | 0.73        | 0.84        | 0.78     | 0.82  | 0.79-0.82 |
| G3_DPYS_1, LB1_LTBR, TN1_CLEC14A_1, N   | 0.81        | 0.75        | 0.79     | 0.81  | 0.79-0.82 |
| G2_VGLL4_2, LB1_LTBR, TN1_CLEC14A_1, N  | 0.84        | 0.72        | 0.79     | 0.81  | 0.79-0.82 |
| TN3_TTC34_1, G3_DPYS_1, N               | 0.68        | 0.85        | 0.76     | 0.81  | 0.79-0.82 |
| TN3_TTC34_1, LB1_LTBR, TN1_CLEC14A_1, N | 0.81        | 0.81        | 0.81     | 0.81  | 0.78-0.81 |
| TN3_TTC34_1, TN1_CLEC14A_1, N           | 0.77        | 0.77        | 0.77     | 0.81  | 0.79-0.82 |

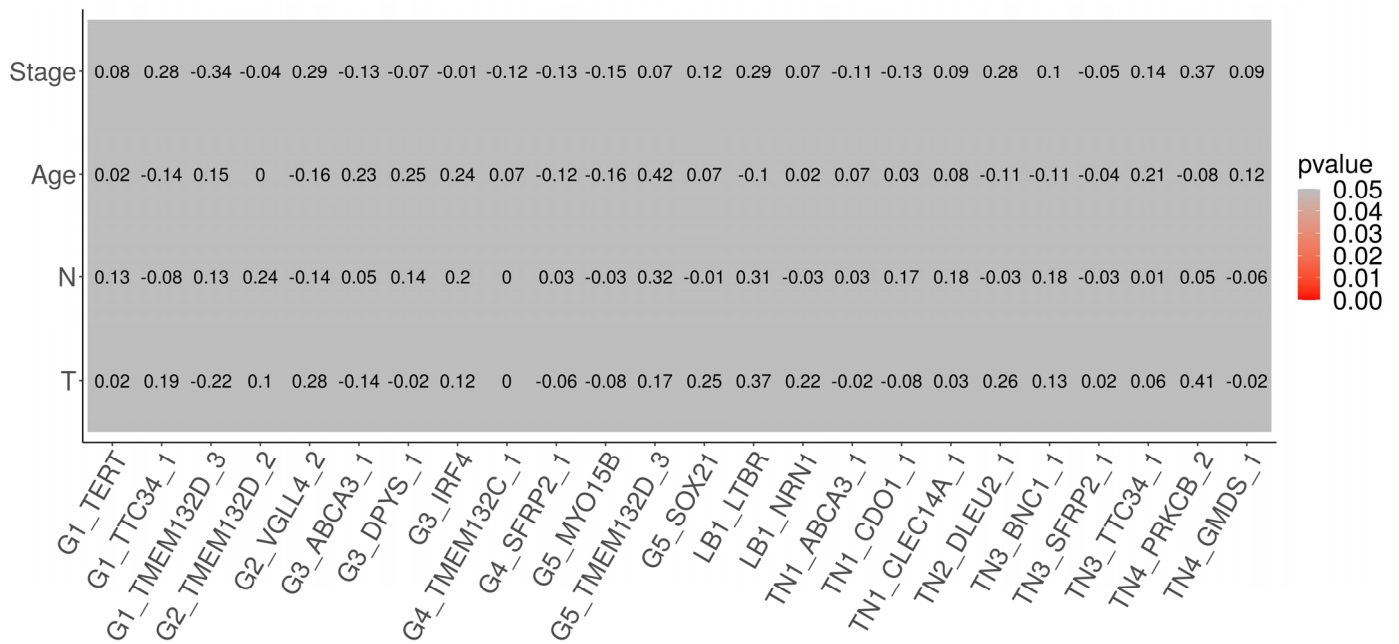

**Figure S1.** Correlations between clinical characteristics and the level of methylation of the selected markers in triple-negative breast cancer. Numbers show the correlation coefficient. No significant ( $p < 0.05$ ) correlations found,  $n=48$ .

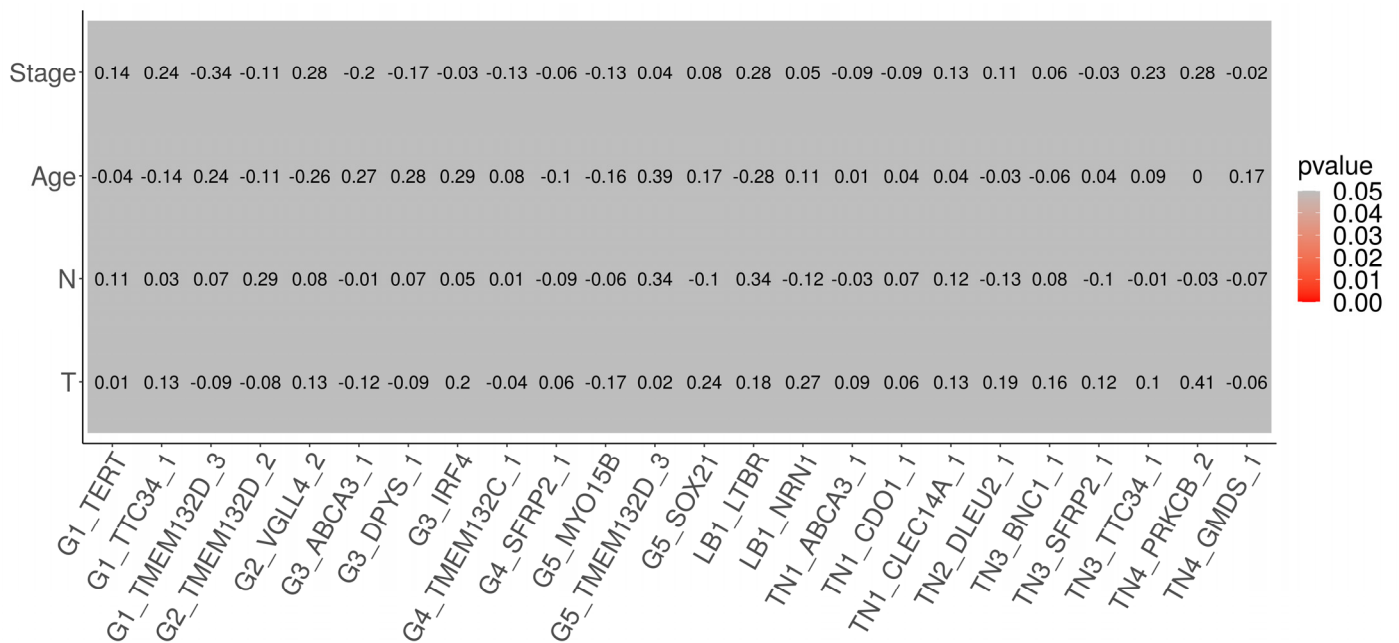

**Figure S2.** Correlations between clinical characteristics and the level of methylation of the selected markers in luminal B breast cancer. Numbers show the correlation coefficient. No significant ( $p < 0.05$ ) correlations found,  $n=35$ .

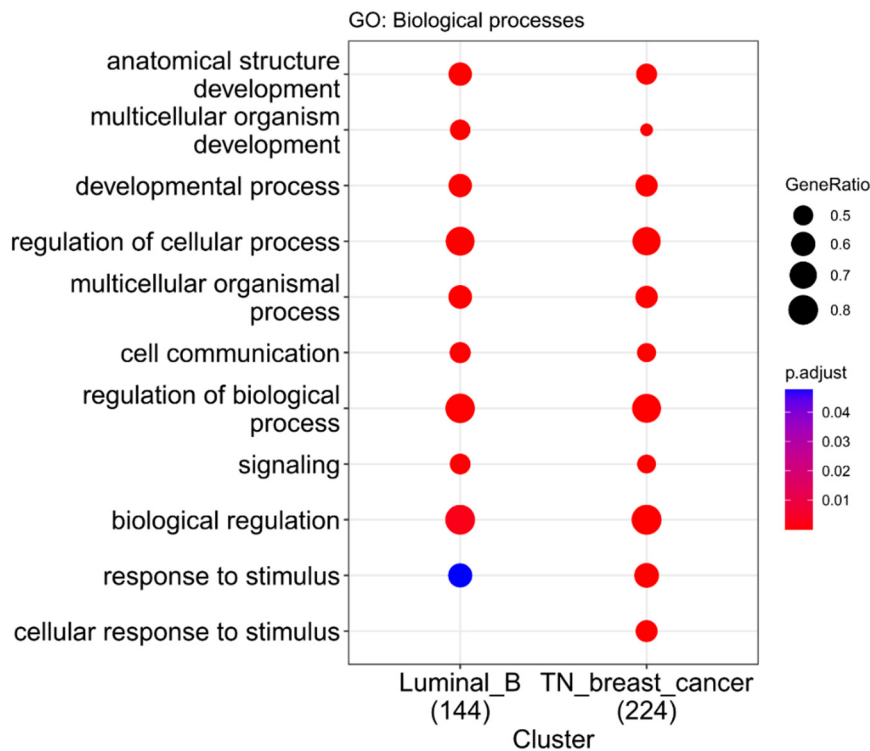

**Figure S3.** Top-10 over-represented Gene Ontology (GO) Biological Processes (BP) terms in TN and luminal B breast cancer subtypes. Y-axis stands for GO:BP terms, X-axis represents breast cancer subtypes, size of bubbles reflects gene ratio (genes in input/all genes in term).

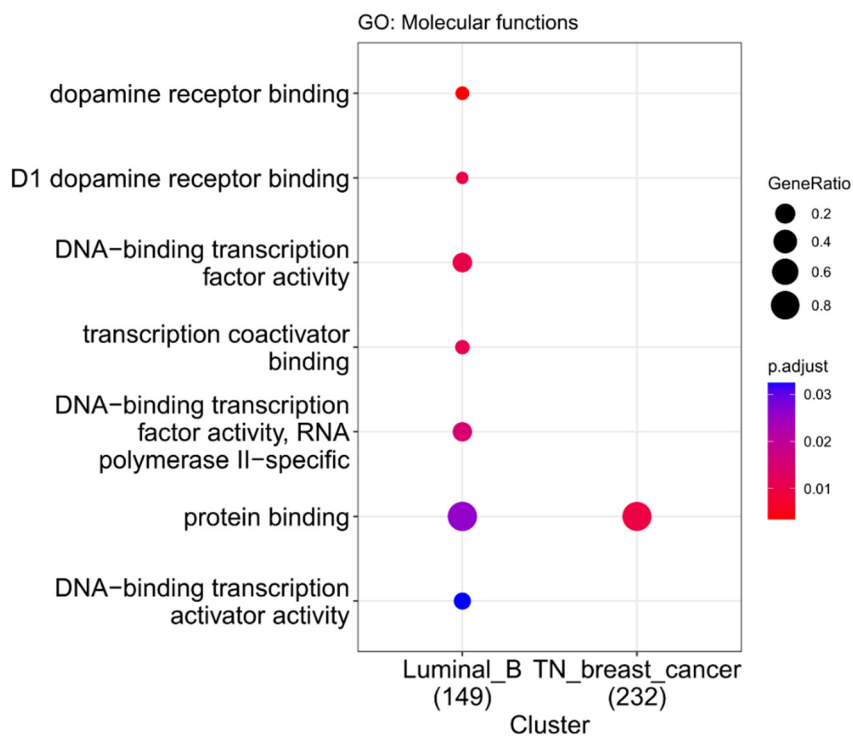

**Figure S4.** Top-10 over-represented Gene Ontology (GO) Molecular functions (MF) terms in TN and luminal B breast cancer subtypes. Y-axis stands for GO:MF terms, X-axis represents breast cancer subtypes, size of bubbles reflects gene ratio (genes in input/all genes in term).

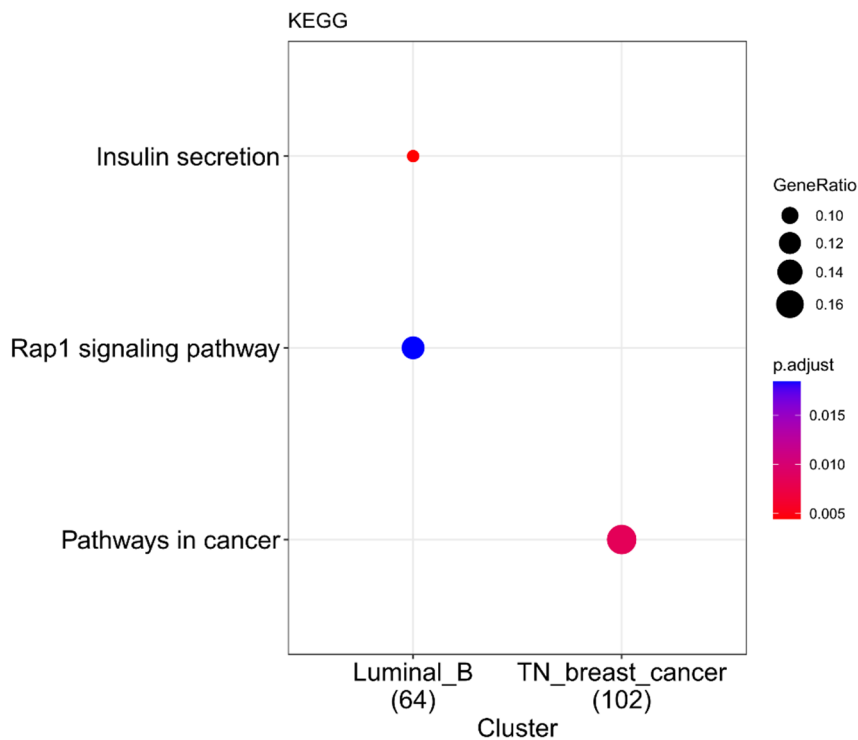

**Figure S5.** Top-10 over-represented Kyoto Encyclopedia of Genes and Genomes (KEGG) terms in TN and luminal B breast cancer subtypes. Y-axis stands for KEGG terms, X-axis represents breast cancer subtypes, size of bubbles reflects gene ratio (genes in input/all genes in term).

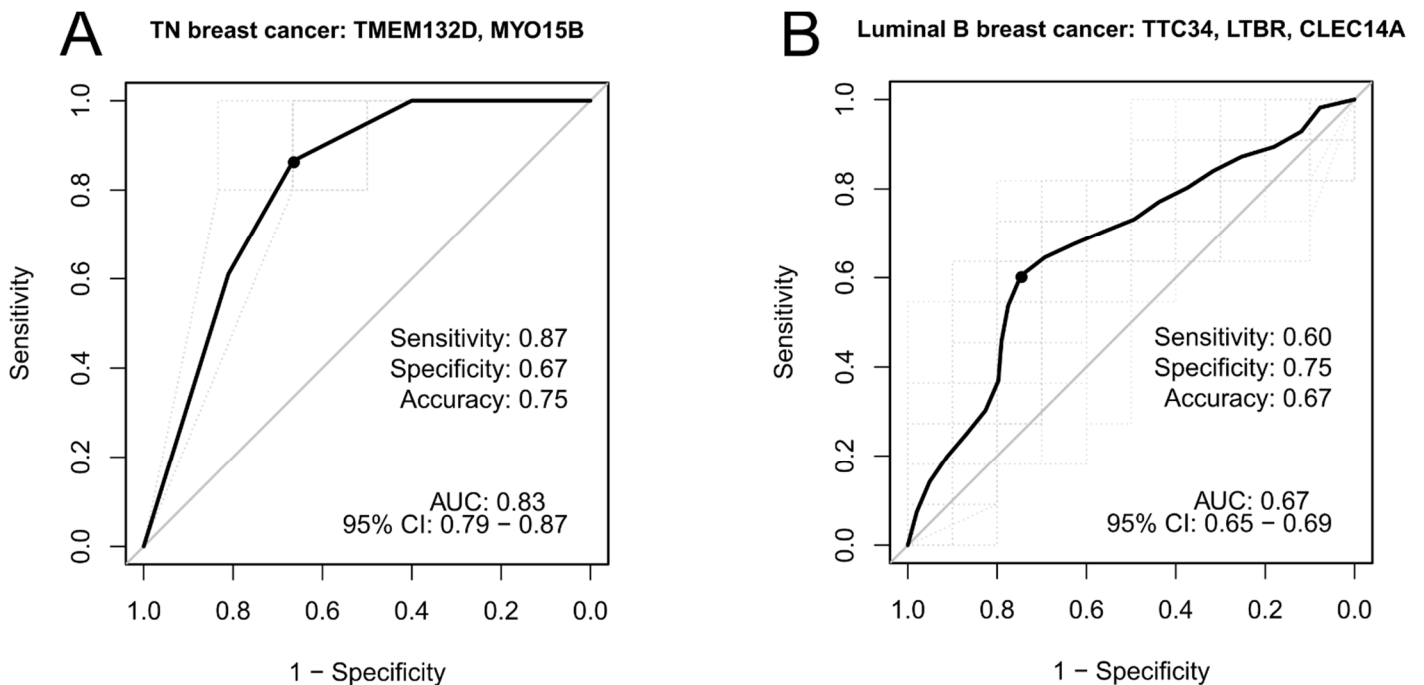

**Figure S6.** ROC curves, cross-validated area under the curve (cvAUC) for breast cancer NACT sensitivity classifiers for TN (A) and luminal.B subtypes (B), validated using discovery cohort RRBS data.
